# Supplementary material for: Predictive Genes in Adjacent Normal Tissue Are Preferentially Altered by sCNV during Tumorigenesis in Liver Cancer and May Rate Limiting
Source: PLoS One. 2011 Jul 5;6(7):e20090. doi: 10.1371/journal.pone.0020090 (PMC3130029; doi:10.1371/journal.pone.0020090)
Supplement: Table S9 — Overlaps between sCNV hotspot correlated genes and co-expression modules. Shown are the overlaps found between genes correlated to the top sCNV hotspots (“Hotspot”) and co-expression modules from AN and TU tissue (“Module”). Also indicated is the fold enrichment of the overlap versus the random expectation in each case (Fold). Only enrichments with a Fishers Exact test p<1e-3 are shown. (XLS) [file pone.0020090.s009.xls]

## Sheet: Table_S9
Table S9
Set1	Set2	Pval	FC
Chr1_hotspot	ANQ43_black	1.9e-79	9.7
Chr1_hotspot	ANQ43_blue	3.6e-17	2.25
Chr1_hotspot	ANQ43_green	2.9e-29	5.05
Chr1_hotspot	ANQ43_grey	3.9e-17	1.52
Chr1_hotspot	ANQ43_peru	9.49e-06	5.04
Chr1_hotspot	ANQ43_purple	3.3e-85	12.16
Chr1_hotspot	ANQ43_yellow	0.0003	1.94
Chr1_hotspot	Chr6_hotspot	2e-135	7.41
Chr1_hotspot	Chr7_hotspot	<1E-300	13.81
Chr1_hotspot	TUQ43_grey	6.5e-40	1.6
Chr1_hotspot	TUQ43_turquoise	3e-174	4.43
Chr14_hotspot	ANQ43_blue	2.5e-10	2.08
Chr14_hotspot	ANQ43_greenyellow	0.0001	2.86
Chr14_hotspot	ANQ43_grey	1.7e-23	1.74
Chr14_hotspot	ANQ43_red	8.2e-10	3.54
Chr14_hotspot	ANQ43_turquoise	0.0001	1.28
Chr14_hotspot	ANQ43_yellow	1.4e-06	2.57
Chr14_hotspot	Chr20_hotspot	<1E-300	16.32
Chr14_hotspot	TUQ43_grey	8.9e-82	2.05
Chr14_hotspot	TUQ43_pink	6.1e-29	8.88
Chr14_hotspot	TUQ43_purple	6.81e-08	4.66
Chr2_hotspot	ANQ43_blue	3.37e-09	2.18
Chr2_hotspot	ANQ43_grey	1e-15	1.69
Chr2_hotspot	ANQ43_magenta	0.0006	2.77
Chr2_hotspot	ANQ43_midnightblue	0.0008	4.09
Chr2_hotspot	ANQ43_turquoise	1.03e-05	1.37
Chr2_hotspot	ANQ43_yellow	2.2e-17	4.72
Chr2_hotspot	ANQ43-red	1.62e-06	3.25
Chr2_hotspot	Chr14_hotspot	<1E-300	17.42
Chr2_hotspot	Chr20_hotspot	<1E-300	18.15
Chr2_hotspot	Chr6_hotspot	3e-160	11.83
Chr2_hotspot	TUQ43_cyan	5.59e-05	5.25
Chr2_hotspot	TUQ43_grey	7.6e-56	2
Chr2_hotspot	TUQ43_lightyellow	4.8e-22	17.78
Chr2_hotspot	TUQ43_magenta	5.47e-05	3.72
Chr2_hotspot	TUQ43_pink	1.24e-09	5.39
Chr2_hotspot	TUQ43_purple	3.1e-30	12.79
Chr20_hotspot	ANQ43_blue	5.15e-06	1.73
Chr20_hotspot	ANQ43_grey	7.2e-24	1.73
Chr20_hotspot	ANQ43_red	1.31e-06	2.85
Chr20_hotspot	ANQ43_salmon	3.74e-06	4.13
Chr20_hotspot	ANQ43_turquoise	0.0006	1.24
Chr20_hotspot	ANQ43_yellow	4.9e-10	3.07
Chr20_hotspot	TUQ43_black	1.3e-20	4.95
Chr20_hotspot	TUQ43_grey	2.2e-61	1.88
Chr20_hotspot	TUQ43_lightyellow	7.92e-06	5.78
Chr20_hotspot	TUQ43_magenta	3.51e-05	3.28
Chr20_hotspot	TUQ43_pink	0.0008	2.7
Chr20_hotspot	TUQ43_purple	6.3e-16	6.92
Chr6_hotspot	ANQ43_blue	0.0002	1.64
Chr6_hotspot	ANQ43_grey	1.6e-20	1.74
Chr6_hotspot	ANQ43_red	4.36e-06	2.97
Chr6_hotspot	ANQ43_turquoise	2.66e-07	1.41
Chr6_hotspot	ANQ43_yellow	2.7e-27	5.62
Chr6_hotspot	Chr14_hotspot	1e-102	7.64
Chr6_hotspot	Chr20_hotspot	8e-163	9.67
Chr6_hotspot	Chr7_hotspot	3.4e-19	3.14
Chr6_hotspot	TUQ43_blue	0.0003	1.64
Chr6_hotspot	TUQ43_grey	1.5e-68	2.04
Chr6_hotspot	TUQ43_grey60	3.1e-11	9.64
Chr6_hotspot	TUQ43_lightyellow	1.13e-05	6.34
Chr6_hotspot	TUQ43_purple	4e-15	7.54
Chr7_hotspot	ANQ43_black	4.2e-90	12.09
Chr7_hotspot	ANQ43_blue	2e-18	2.48
Chr7_hotspot	ANQ43_green	7.2e-83	10.33
Chr7_hotspot	ANQ43_purple	1e-172	22
Chr7_hotspot	TUQ43_turquoise	8e-258	5.98
